# Supplementary material
Source: PubMed Central journal article supplement (PMC6866089)
Supplement: MCN-14-e12615-s001.pdf [file MCN-14-e12615-s001.pdf]

## Appendix 1

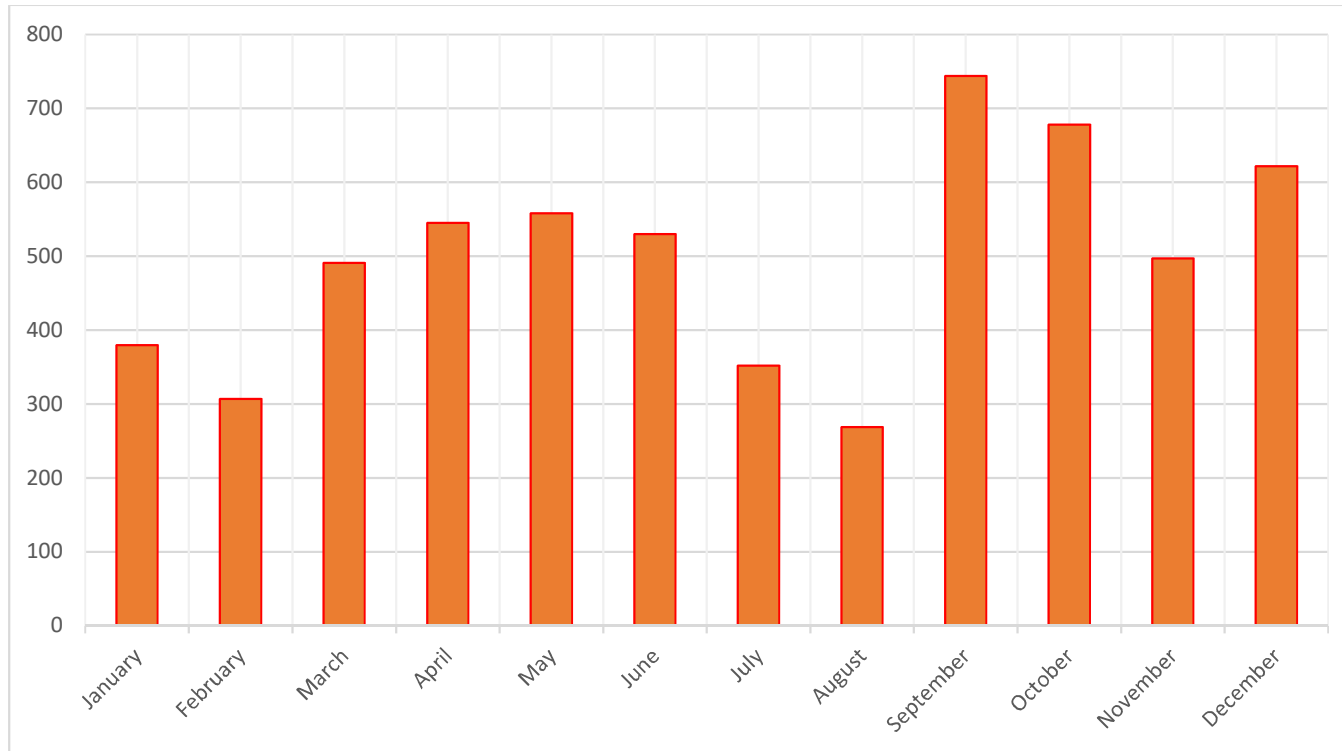

Fig. 1.1 Admissions of children (6-59 months old) with uncomplicated severe acute malnutrition to outpatient treatment programmes in Tahoua department in 2013

| Month                          | Jan        | Feb  | Mar              | Apr                | May   | Jun   | Jul    | Aug       | Sep            | Oct                | Nov  | Dec |
|--------------------------------|------------|------|------------------|--------------------|-------|-------|--------|-----------|----------------|--------------------|------|-----|
| <b>Rains</b>                   |            |      |                  |                    |       | X     | X      | X         | X              |                    |      |     |
| <b>Agricultural activities</b> |            |      |                  |                    |       |       |        |           |                |                    |      |     |
| <b>Millet</b>                  |            |      | Land preparation |                    | Plant |       |        | Eat green | Harvest        |                    | Sell |     |
| <b>Sorghum</b>                 | Sell       |      | Land preparation |                    | Plant |       |        |           |                | Harvest            |      |     |
| <b>Cow pea</b>                 | Sell       |      | Land preparation |                    |       | Plant |        | Harvest   |                | Sell               |      |     |
| <b>Market gardening</b>        | Cultivate  | Sell |                  | No gardening tasks |       |       |        |           | Grow seedlings | Garden preparation |      |     |
| <b>Livestock</b>               |            |      |                  |                    |       |       |        |           |                |                    |      |     |
| <b>Animal migration</b>        | At home    |      | Leave            | Away               |       |       | Return | At home   |                |                    |      |     |
| <b>Animal sales</b>            | Buy & sell | Sell |                  |                    |       |       |        |           | Buy            |                    |      |     |
| <b>Labour migration</b>        | Away       |      | Return           |                    |       |       |        | Leave     |                |                    |      |     |
| <b>Disease</b>                 |            |      |                  |                    |       |       |        |           |                |                    |      |     |
| <b>Malaria</b>                 |            |      |                  |                    |       | X     | X      | X         | X              | X                  | X    |     |

Fig. 1.2 Seasonal calendar for Tahoua, Niger

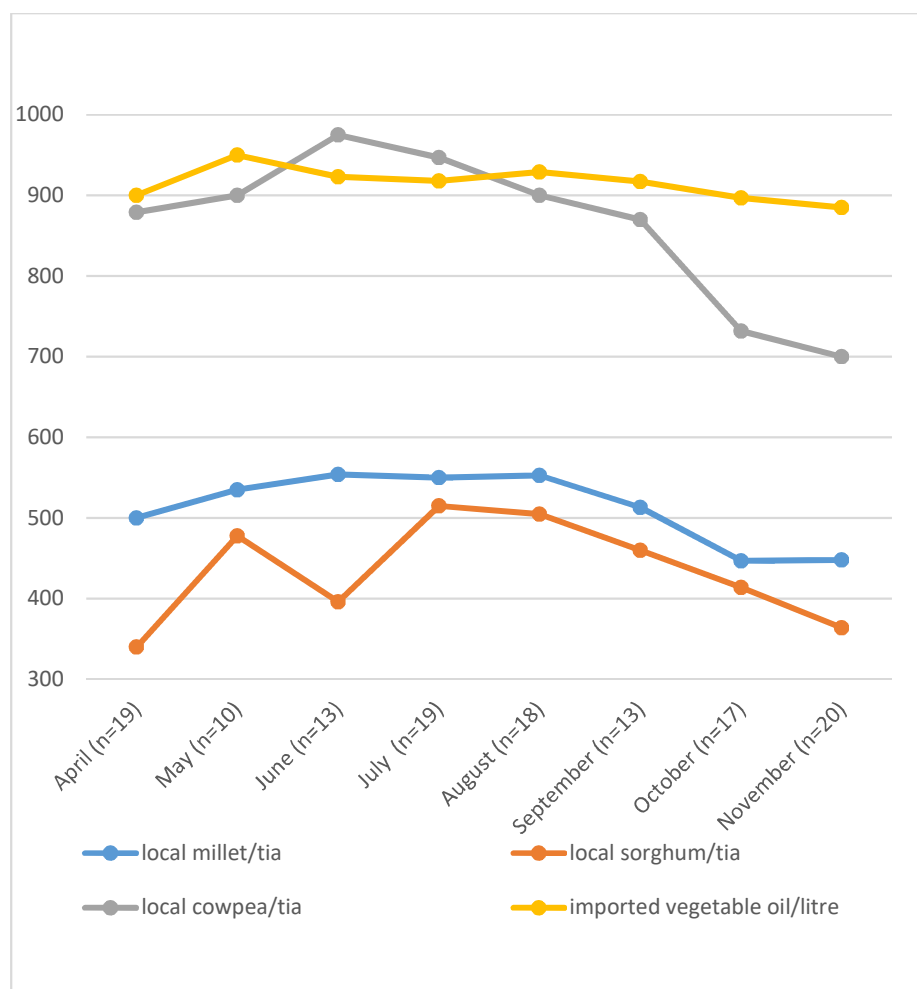

Fig. 1.3 Average selling prices (/FCFA) of key commodities between April and November 2015, in five markets in Affala and Takanamatt, Tahoua, Niger (n = number of market visits at which data were collected; 1 tia millet/sorghum = 2.5kg and 1 tia cowpea = 2.8kg, 1 tia millet/sorghum=1 days consumption for household of 5 and

1 tia cowpea = 5.5 days for a household of 5, according to the WFP's standard ration of 500g of cereal and 100g of pulses per person per day)

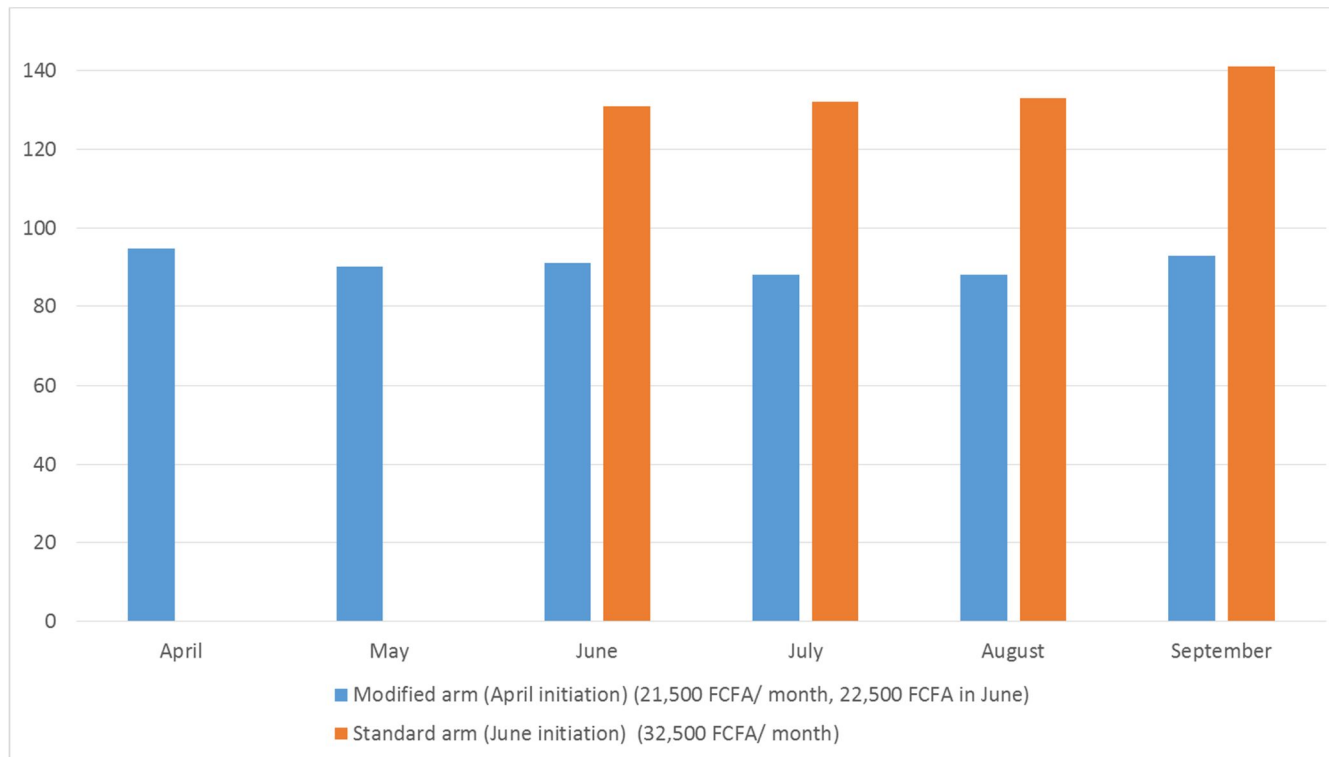

Fig. 1.4 Percentage of the standard food basket of rations for a household of 5 people covered by the monthly cash transfer in 2015, by trial arm

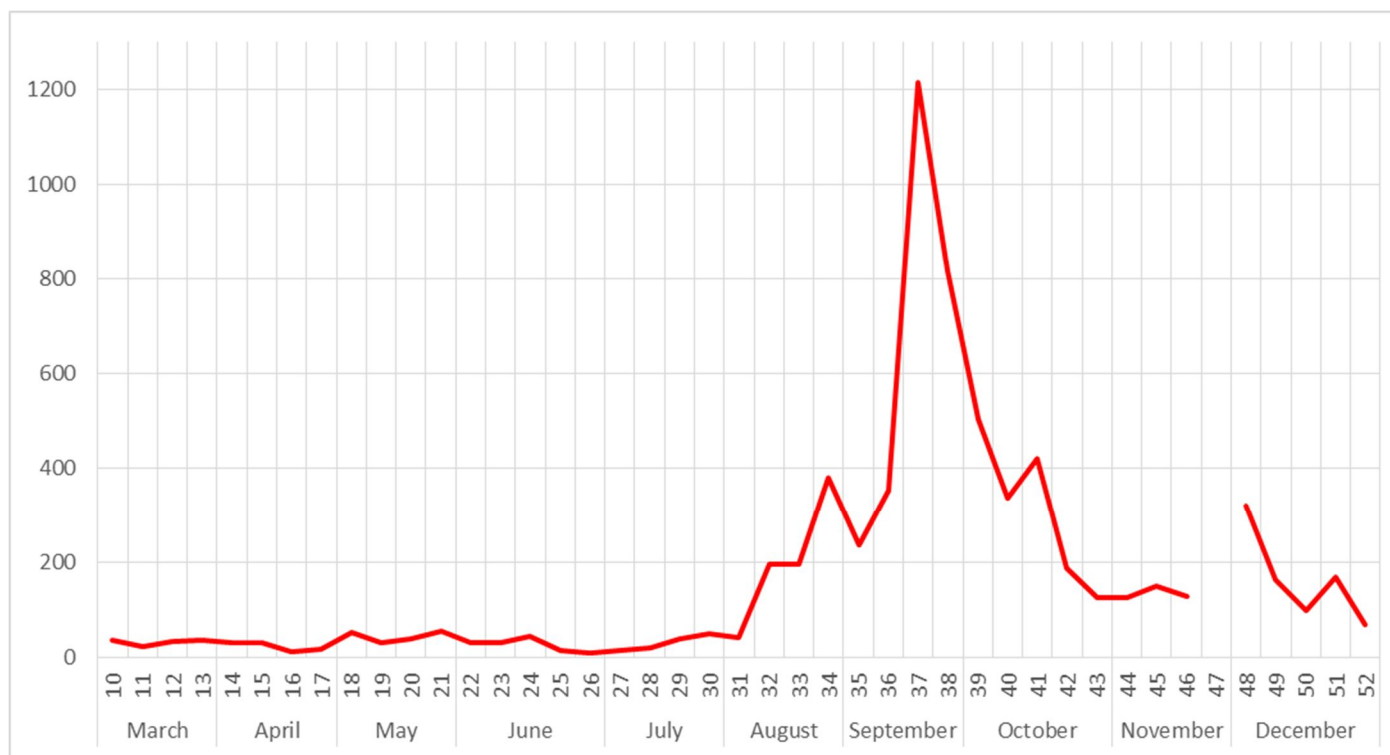

Fig. 1.5 Cases of malaria reported in children by epidemiological week between March and December 2015 in health centres in Affala and Takanamatt, Tahoua, Niger (diagnosed with rapid diagnostic tests or by symptoms when test kits were not available)
